# Supplementary material
Source: HighWire-hosted journal article supplement (https://erj.ersjournals.com/content/56/3/2001123)
Supplement: inline-supplementary-material-1 [file inline-supplementary-material-1.pdf]

**Supplement Table 1:** Metadata and references for curated GEO deposited datasets of primary human airway epithelial cells.

| GSE Accession | Affymetrix Chip  | Sample Annotations (N=504)                                                                     | Citation                    |
|---------------|------------------|------------------------------------------------------------------------------------------------|-----------------------------|
| GSE4302       | HG-U133_Plus_2   | 15 current smokers<br>11 never smokers<br>2 unknown                                            | Woodruff et al., 2007; 2009 |
| GSE37147      | HuGene-1_0-st-v1 | 82 former smokers (49 male, 33 female)<br>69 current smokers (34 male, 35 female)<br>8 unknown | Steiling et al., 2013       |
| GSE67472      | HG-U133_Plus_2   | 23 male<br>20 female                                                                           | Christenson et al., 2015    |
| GSE108134     | HG-U133_Plus_2   | 176 current smokers<br>98 never smokers                                                        | O'Beirne et al., 2018       |

Christenson SA, Steiling K, van den Berge M, Hijazi K, Hiemstra PS, Postma DS, Lenburg ME, Spira A, Woodruff PG. Asthma-COPD overlap. Clinical relevance of genomic signatures of type 2 inflammation in chronic obstructive pulmonary disease. *American journal of respiratory and critical care medicine* 2015; 191: 758-766.

O'Beirne SL, Shenoy SA, Salit J, Strulovici-Barel Y, Kaner RJ, Visvanathan S, Fine JS, Mezey JG, Crystal RG. Ambient Pollution-related Reprogramming of the Human Small Airway Epithelial Transcriptome. *American journal of respiratory and critical care medicine* 2018; 198: 1413-1422.

Steiling K, van den Berge M, Hijazi K, Florido R, Campbell J, Liu G, Xiao J, Zhang X, Duclos G, Drizik E, Si H, Perdomo C, Dumont C, Coxson HO, Alekseyev YO, Sin D, Pare P, Hogg JC, McWilliams A, Hiemstra PS, Sterk PJ, Timens W, Chang JT, Sebastiani P, O'Connor GT, Bild AH, Postma DS, Lam S, Spira A, Lenburg ME. A dynamic bronchial airway gene expression signature of chronic obstructive pulmonary disease and lung function impairment. *American journal of respiratory and critical care medicine* 2013; 187: 933-942.

Woodruff PG, Boushey HA, Dolganov GM, Barker CS, Yang YH, Donnelly S, Ellwanger A, Sidhu SS, Dao-Pick TP, Pantoja C, Erle DJ, Yamamoto KR, Fahy JV. Genome-wide profiling identifies epithelial cell genes associated with asthma and with treatment response to corticosteroids. *Proceedings of the National Academy of Sciences of the United States of America* 2007; 104: 15858-15863.

Woodruff PG, Modrek B, Choy DF, Jia G, Abbas AR, Ellwanger A, Koth LL, Arron JR, Fahy JV. T-helper type 2-driven inflammation defines major subphenotypes of asthma. *American journal of respiratory and critical care medicine* 2009; 180: 388-395.
