# Supplementary material
Source: HighWire-hosted journal article supplement (https://erj.ersjournals.com/content/56/3/2001123)

# Supplement Figure 3

Anti-GRP78 (78 kDa) antibody – HPA038845

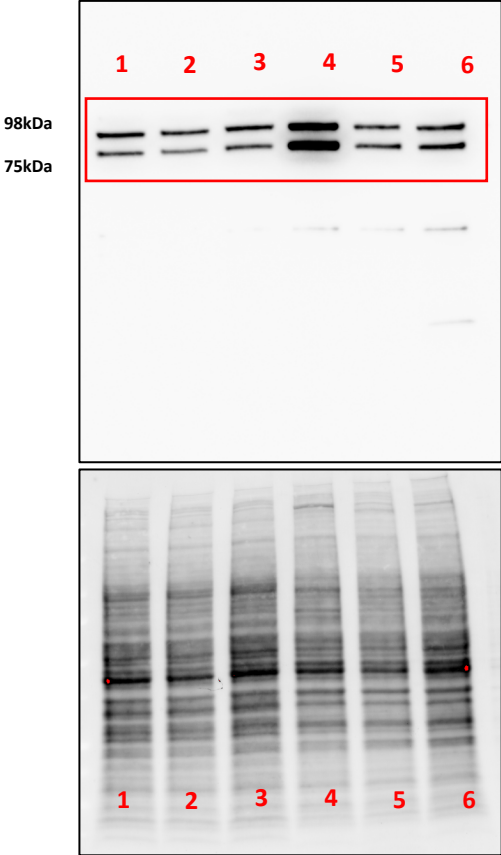

Supplement: inline-supplementary-material-5 [file inline-supplementary-material-5.pdf]
