# Supplementary material
Source: HighWire-hosted journal article supplement (https://erj.ersjournals.com/content/56/3/2001123)

Supplement Figure 5

Examples of positive ACE-2 immunohistochemistry in human lung microvasculature

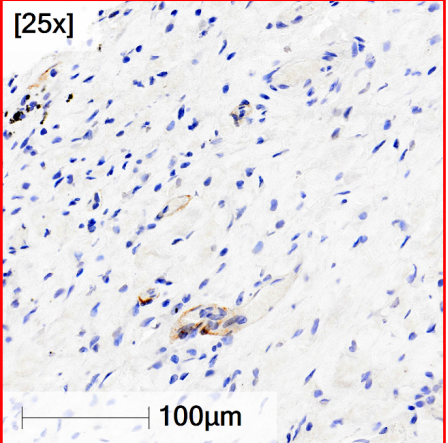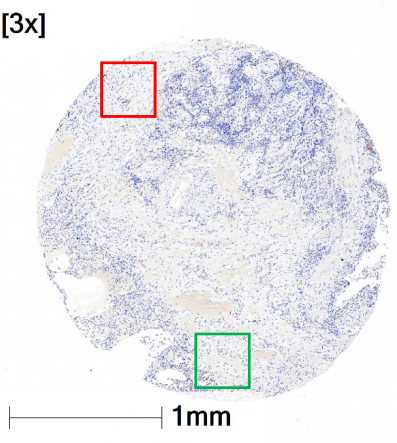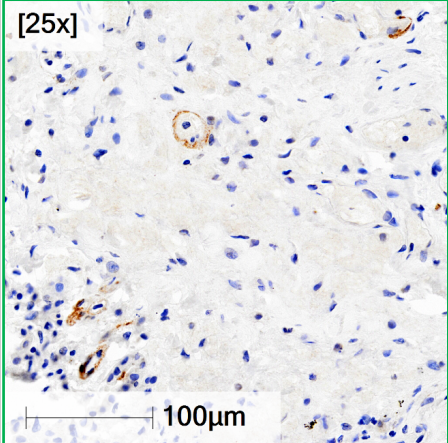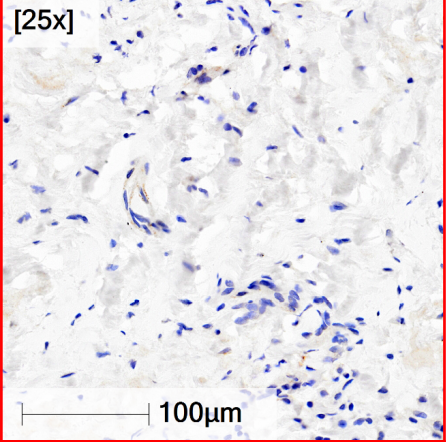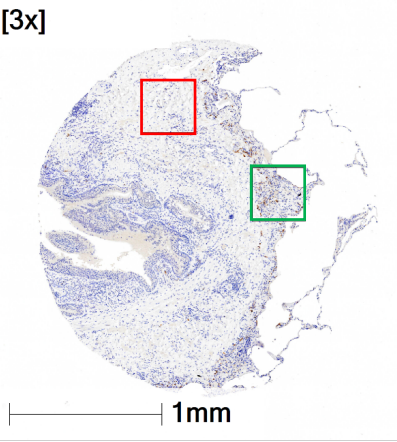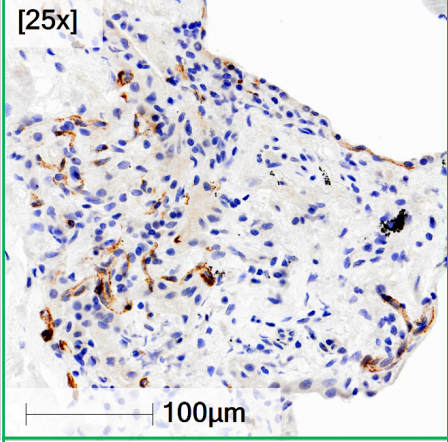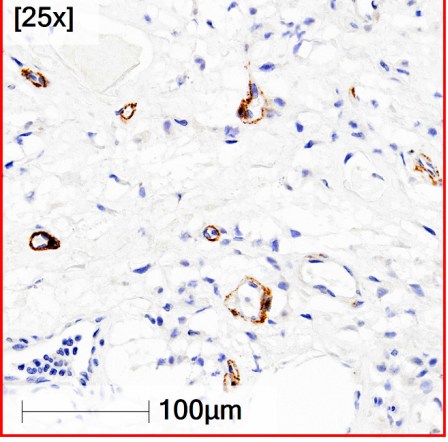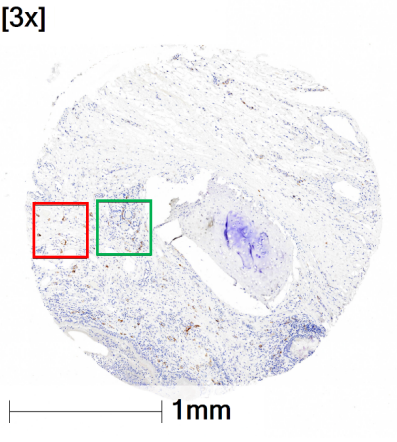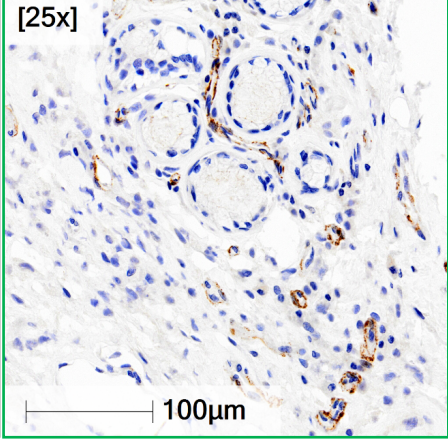

Supplement: inline-supplementary-material-7 [file inline-supplementary-material-7.pdf]
