# Supplementary material
Source: HighWire-hosted journal article supplement (https://erj.ersjournals.com/content/56/3/2001123)

# Supplement Figure 6

## Examples of positive ACE-2 immunohistochemistry in human heart

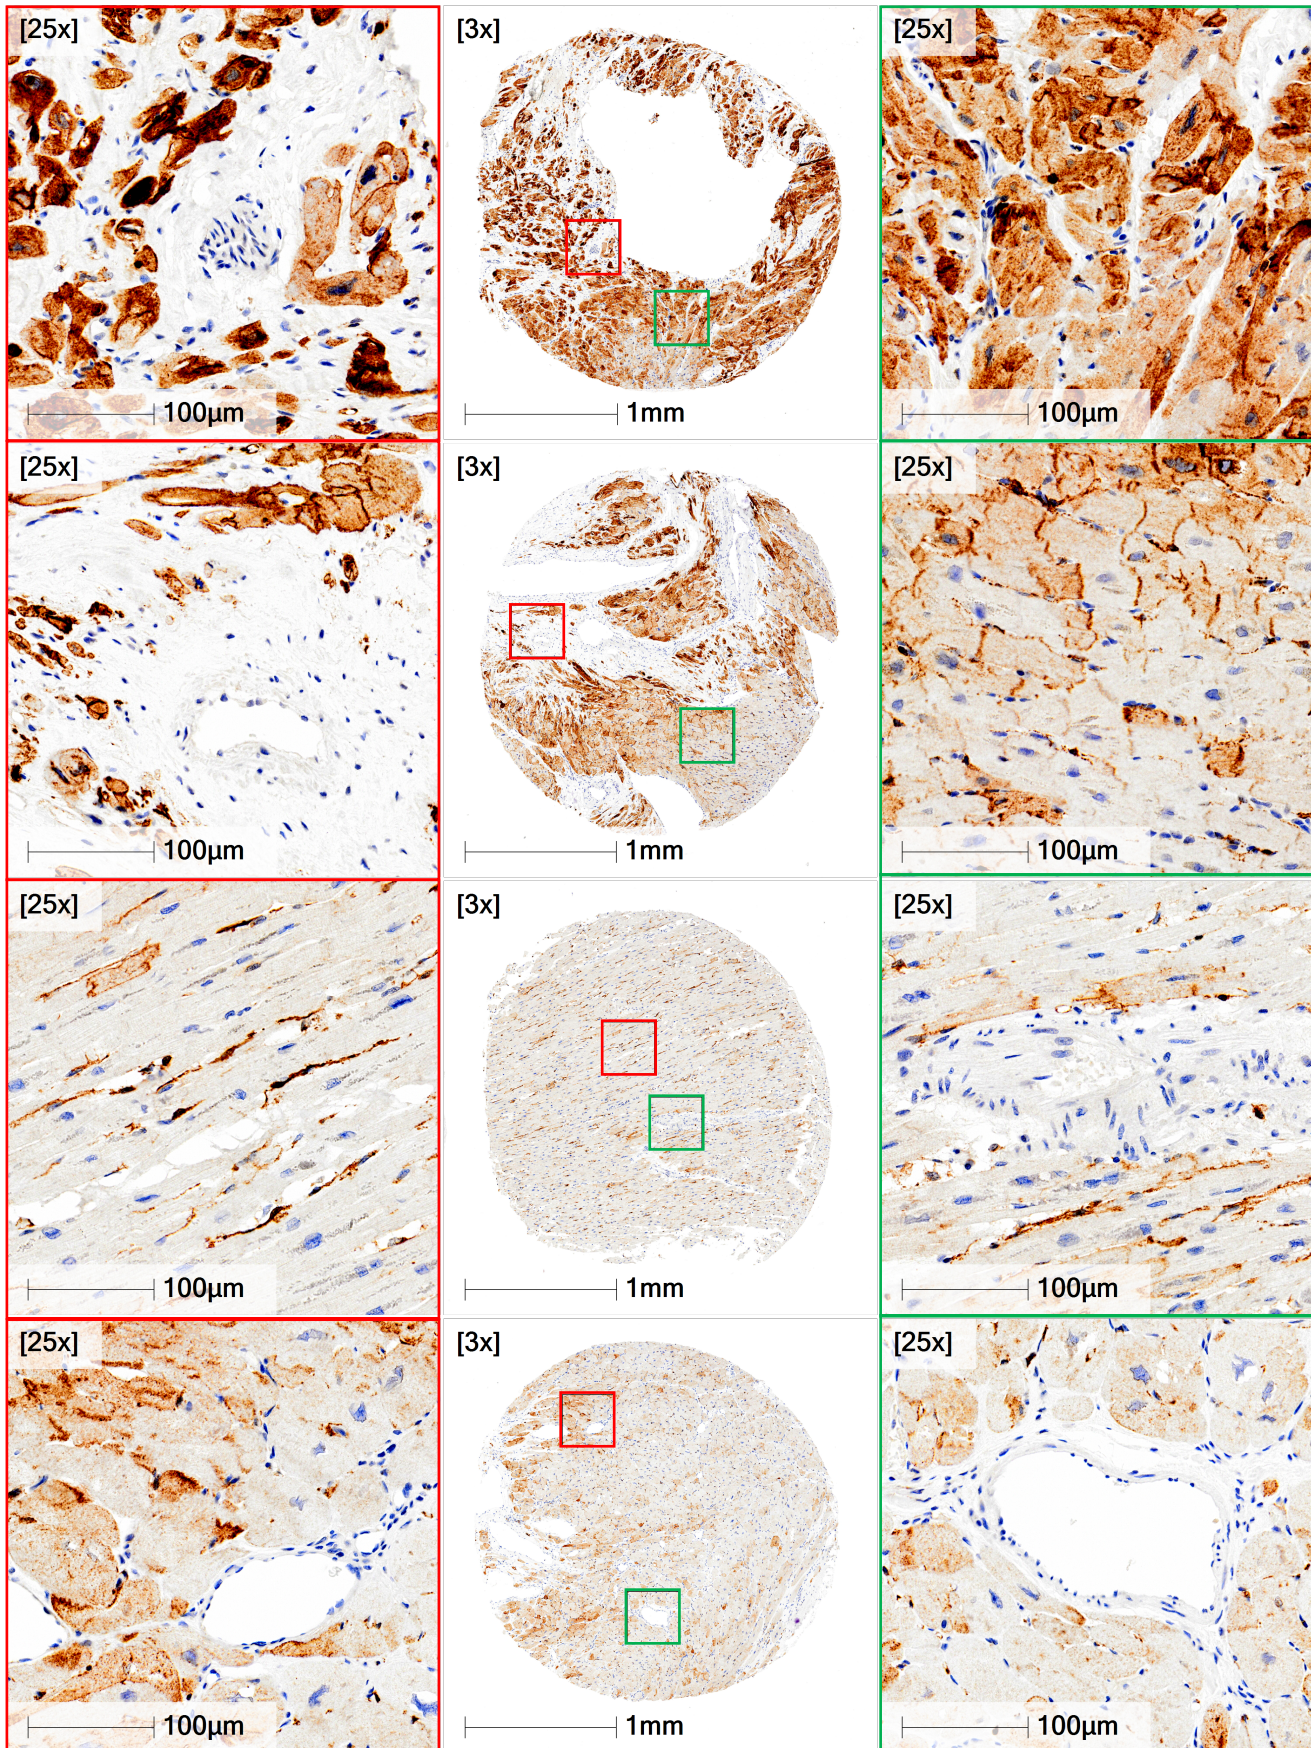

Supplement: inline-supplementary-material-8 [file inline-supplementary-material-8.pdf]
